# Accessory Gene Regulator Group II Polymorphism in Methicillin-Resistant *Staphylococcus aureus* Is Predictive of Failure of Vancomycin Therapy

Pamela A. Moise-Broder,<sup>1</sup> George Sakoulas,<sup>2</sup> George M. Eliopoulos,<sup>3</sup> Jerome J. Schentag,<sup>1</sup> Alan Forrest,<sup>1</sup> and Robert C. Moellering, Jr.<sup>3</sup>

<sup>1</sup>School of Pharmacy and Pharmaceutical Sciences, State University of New York at Buffalo, CPL Associates, Amherst, and <sup>2</sup>Crystal Run Healthcare, Middletown, New York; and <sup>3</sup>Beth Israel Deaconess Medical Center and Harvard Medical School, Boston, Massachusetts

We studied methicillin-resistant *Staphylococcus aureus* (MRSA) isolates to determine if the group II polymorphism at the accessory gene regulator (*agr*) locus demonstrated any relationship with the clinical efficacy of vancomycin. One hundred twenty-two MRSA isolates from 87 patients treated with vancomycin were evaluated. Forty-five of 87 patients had no clinical or bacteriological response to vancomycin. Among the 36 clinically evaluable patients with the *agr* group II polymorphism, 31 had an infection that failed to respond to vancomycin, whereas only 5 had an infection that responded successfully to vancomycin. This finding is of interest in light of our previous findings that glycopeptide-intermediately resistant *S. aureus* (GISA) and hetero-GISA clinical isolates in the United States and Japan are enriched for the *agr* group II polymorphism, and it suggests a possible intrinsic survival advantage of some *S. aureus* clones with this genetic marker under vancomycin selective pressure.

In the United States, methicillin-resistant *Staphylococcus aureus* (MRSA) has become a prevalent nosocomial pathogen, and it is a frequent cause of serious infections, such as endocarditis, pneumonia, osteomyelitis, and bacteremia [1–4]. In addition, several case reports have described *S. aureus* clinical isolates with reduced susceptibility to vancomycin [5–10]. There have also been reports suggesting that results of vancomycin treatment can be quite variable and that treatment with this antibiotic may sometimes be ineffective, despite laboratory susceptibility of the organism to vancomycin [11–14].

The accessory gene regulator (*agr*) operon of *S. au-*

*reus* is a key global regulon that coordinately controls many critical virulence pathways in this organism, including those involved in exoprotein, exotoxin, and adhesin expression. In general, *agr* upregulates production of secreted virulence factors, such as hemolysins and proteases, and downregulates production of virulence factors expressed on the staphylococcal cell surface [15, 16]. DNA sequence polymorphisms at this locus comprise 4 *S. aureus agr* groups. Recent studies have demonstrated that some *agr* specificity groups are associated with distinct clinical situations. For example, community-acquired MRSA usually have the *agr* group III polymorphism [17–19], glycopeptide-intermediately resistant *S. aureus* (GISA) are highly enriched for the *agr* group II polymorphism [20], and exfoliatin-producing strains are enriched for the *agr* group IV polymorphism [21]. In light of our previous findings that *agr* group II predominates among GISA isolates [20, 22], we studied clinical MRSA isolates to determine if the group II *agr* polymorphism demonstrated any relationship to the clinical efficacy of vancomycin.

Received 20 November 2003; accepted 3 February 2004; electronically published 21 May 2004.

Presented in part: 42nd Interscience Conference on Antimicrobial Agents and Chemotherapy, 27–30 September 2002, San Diego (abstract C1-1059).

Reprints or correspondence: Dr. Pamela A. Moise-Broder, CPL Associates, 3980 Sheridan Dr., Ste. 501, Amherst, NY 14226 (pmoise@cplassociates.com).

**Clinical Infectious Diseases** 2004;38:1700–5

© 2004 by the Infectious Diseases Society of America. All rights reserved.  
1058-4838/2004/3812-0006\$15.00

## PATIENTS, MATERIALS, AND METHODS

### Patients

All patients with viable MRSA isolates available in our frozen MRSA repository were eligible for enrollment. The MRSA repository contains ~400 MRSA isolates from ~200 patients. To be included in the present study, patients were also required to have been a participant in a larger multicenter, phase III and IV prospective study from July 1998 through November 2001 and to have received vancomycin for treatment of MRSA infection. For each study, appropriate ethical regulations were followed, and the study was approved by the ethics committee or institutional review board at each participating institution.

The 87 patients included in this analysis were from 24 hospitals, representing Connecticut, Delaware, Florida, Hawaii, Iowa, Illinois, Louisiana, Massachusetts, Maryland, New Jersey, New York, Ohio, Pennsylvania, Rhode Island, Texas, and Washington. Patients were classified as having a clinically significant MRSA infection, as defined elsewhere [23]. As part of the phase III and IV studies, patients were required to have documented signs and symptoms of a serious infection, such as fever, shaking chills, leukocytosis with a prominent shift to the left, and significant changes in vital signs. Patients who were merely colonized with MRSA were excluded from analysis. Forty-five of 87 patients had infections that failed to respond clinically and bacteriologically to vancomycin.

**Definition of vancomycin treatment failure.** Vancomycin treatment failure was defined for patients who had received an appropriate vancomycin dosage for at least 5 days, with persistently positive culture results and  $\geq 1$  of the following: (1) persistence of signs and symptoms of infection observed at baseline, (2) appearance of new signs or symptoms, and (3) worsening of a sign or symptom observed at baseline. Signs and symptoms of infection used in this evaluation included fever, shaking chills, leukocytosis with a prominent shift to the left, and significant changes in vital signs.

**Evaluable populations.** MRSA isolates were recovered from 87 patients treated with vancomycin, 63 of whom were clinically and microbiologically evaluable for response to that agent. Patients were considered to be evaluable if they had received vancomycin for at least 5 days, the response of infection to vancomycin therapy was classified as being either a treatment success or a treatment failure, a test-of-cure assessment was performed after vancomycin treatment had been discontinued, there were no protocol violations precluding assessment of clinical outcome, and the infection outcome was not classified as being indeterminate because of confounding circumstances that precluded classification into either the treatment success or treatment failure category.

**Mortality.** Thirty-day mortality was based on the patients' status 30 days after the onset of MRSA infection.

### Organisms

Clinical MRSA isolates, which had been stored at  $-70^{\circ}\text{C}$ , were grown and maintained on trypticase-soy blood agar for subsequent testing. Vancomycin susceptibility testing was performed at a central laboratory by broth dilution, according to NCCLS guidelines.

### PCR for agr Group II-Specific Primers

Clinical MRSA isolates were analyzed by PCR using *agr* II-specific primers, as reported elsewhere [24]. The 5' primer sequence (GenBank accession no. AF001782; bp 155–163) was 5'-GTAGAGCCGTATTGATTCC-3', and the 3' primer sequence (GenBank accession no. AF001782; bp 600–618) was 5'-GTATTTTCATCTCTTTAAGG-3'. Reaction conditions are described elsewhere [20, 25]. In brief, 2–3 colonies of bacteria were randomly selected from an inoculum on a blood agar plate and resuspended in 100  $\mu\text{L}$  of sterile water. One microliter of this suspension was added to 29  $\mu\text{L}$  of PCR reaction mixture. The PCR program comprised an initial denaturation at  $95^{\circ}\text{C}$  for 5 min, 30 cycles of denaturation at  $95^{\circ}\text{C}$  for 30 s, annealing at  $55^{\circ}\text{C}$  for 30 s, and extension at  $72^{\circ}\text{C}$  for 60 s, as well as a final extension step at  $72^{\circ}\text{C}$  for 10 min [24]. The analysis of the clinical strains was done in groups of 20, and each experiment was accompanied by a positive control strain (*agr* group II prototype strain RN6607) and a negative control strain (*agr* group I prototype strain RN6390b). Both strains are well characterized elsewhere [26]. Products were analyzed using standard methods of agarose gel electrophoresis [20, 25].

### Statistical Methods

Dichotomous variables were compared by means of  $\chi^2$  analysis or Fisher's exact test, when appropriate. Continuous variables were analyzed with the Kruskal-Wallis analysis of variance. Multivariate analysis was done using logistic regression. Significance was defined as  $P < .05$ . Statistical analysis of the data was performed using SAS software, version 8.02 (SAS Institute).

To avoid the introduction of bias into the evaluation of this study, investigators classified the patient's infection response to vancomycin before PCR was performed. In addition, the individuals who performed PCR analysis were blinded to the infection response to vancomycin, as well as to any other information linking isolates to patients. Each isolate was coded with a unique number and labeled only with that number when shipped for PCR testing. Efficacy responses and the presence of the group II polymorphism at the *agr* locus were both determined prior to unblinding the study.

## RESULTS

From July 1998 through November 2001, 87 patients treated with vancomycin for an infection due to MRSA were identified.

They ranged in age from 24 to 99 years, with a mean age ( $\pm$ SD) of  $65.7 \pm 16.3$  years. There were slightly more men (56.3%) than women. The mean baseline creatinine clearance rate ( $\pm$ SD) was  $64.1 \pm 38.3$  mL/min (median, 58.6 mL/min). At baseline, 36 (41.4%) of 87 patients were receiving mechanical ventilation, and 40 (46.0%) of 87 were in an intensive care unit. Many patients had significant comorbidities, such as congestive heart failure (25 patients), coronary artery disease (25), chronic obstructive pulmonary disease (25), diabetes (24), dialysis-dependent renal failure (10), and malignancy (10).

Table 1 contains a description of the types of infections treated with vancomycin. Of the 87 patients who received vancomycin, 63 were clinically and bacteriologically evaluable. Respiratory infections were found in 34 (39.1%) of 87 patients who received vancomycin and 22 (34.9%) of 63 patients who were clinically and bacteriologically evaluable. Central catheter-related bacteremia infections were observed in 19 (21.8%) of 87 vancomycin recipients and in 13 (20.6%) of 63 evaluable patients. MRSA bacteremia was identified in 40 (46%) of 87 patients who received vancomycin and in 34 (54.0%) of 63 patients who were clinically and bacteriologically evaluable. Of patients clinically and bacteriologically evaluable, MRSA was isolated from blood cultures of patients with bone and joint, intraabdominal, respiratory tract, and skin and skin structure infections; central catheter-related bacteremia; and endocarditis. Infection response rates to vancomycin by population are also shown in table 1.

**MICs of vancomycin and treatment outcome.** Table 2 reveals results of univariate analysis of variables and vancomycin treatment outcome. Despite the fact that all organisms were susceptible to vancomycin by MIC testing (i.e., MICs  $\leq 4$   $\mu$ g/mL), univariate analysis demonstrated that, as MICs of vancomycin increased within the susceptible range, there was a statistically significant association with vancomycin treatment failure.

**Relationship between clinical characteristics of MRSA with the agr group II polymorphism and vancomycin efficacy.** In the univariate analysis, there was decreased vancomycin efficacy against MRSA infection when the infecting isolate contained the group II polymorphism at the agr locus (table 2). Thirty-one (68.9%) of the 45 patients in the treatment failure group had isolates with the agr group II polymorphism, compared with only 5 (27.8%) of the 18 patients whose infection responded successfully to vancomycin. Of the 24 patients whose infection response was classified as indeterminate, 16 (66.7%) had agr group II isolates.

Significant univariate predictors of infection response to vancomycin were entered into a logistic regression analysis (table 3). Creatinine clearance rate and the group II agr polymorphism remained important predictors of the response of MRSA in-

**Table 1. Types and sites of methicillin-resistant *Staphylococcus aureus* infection.**

| Infection type or site              | Response to vancomycin therapy, no. of patients |                  |                        |
|-------------------------------------|-------------------------------------------------|------------------|------------------------|
|                                     | Success (n = 18)                                | Failure (n = 45) | Indeterminate (n = 24) |
| Central catheter-related bacteremia | 9                                               | 4                | 6                      |
| Bacteremia of unknown origin        | 1                                               | 5                | 0                      |
| Bone and joint                      | 1                                               | 7                | 0                      |
| Device                              | 0                                               | 1                | 0                      |
| Endocarditis                        | 0                                               | 3                | 0                      |
| Intraabdominal                      | 1                                               | 1                | 0                      |
| Respiratory                         | 5                                               | 17               | 12                     |
| Skin and skin structure             | 1                                               | 6                | 6                      |
| Urinoma <sup>a</sup>                | 0                                               | 1                | 0                      |

<sup>a</sup> Renal allograft pyelonephritis with infected extrarenal urine collection.

fection to vancomycin. For every 10-mL/min decrease in the clearance rate, the odds of a successful response to vancomycin decreased by  $\sim 20\%$ . The odds of successful vancomycin treatment against infections with isolates that had the agr group II polymorphism were  $\sim 6.9$  times higher than against infections due to agr group II isolates.

**Relationship between the group II agr polymorphism, infection site, prior vancomycin use, and year of isolate recovery.** Thirty-six (57.1%) of the 63 clinically and microbiologically evaluable patients had MRSA infections with agr group II isolates. As stated above in the Patients subsection, these 63 patients had a variety of infections and were identified from July 1998 through November 2001. There was no statistically significant relationship between the prevalence of infecting isolates with the agr group II polymorphism and the site of MRSA infections in the evaluable population ( $P = .3731$ ). There was also no significant relationship between the prevalence of infecting isolates with the agr group II polymorphism and the following durations of vancomycin treatment before performance of culture: 0 days, 1–4 days, 5–14 days, 15–28 days, and  $>28$  days ( $P = .7738$ ). Finally, there was no significant relationship between the year in which isolates were recovered (1998, 1999, 2000, or 2001) and the prevalence of infecting isolates with the agr group II polymorphism ( $P = .2317$ ).

**Relationship between the agr group II polymorphism and 30-day mortality.** Thirty-day all-cause mortality was not associated with isolates with the agr specificity group II polymorphism. Overall 30-day mortality involved 8 (22.2%) of 36 patients with agr group II MRSA isolates and 6 (22.2%) of 27 patients with non-agr group II isolates. No attempt was made

**Table 2. Univariate analysis of factors associated with response to vancomycin therapy.**

| Factor                                     | Response to vancomycin therapy |                     | P    |
|--------------------------------------------|--------------------------------|---------------------|------|
|                                            | Success<br>(n = 18)            | Failure<br>(n = 45) |      |
| Demographic/clinical characteristic        |                                |                     |      |
| Age, years                                 | 65.5 ± 17.2 (71.5)             | 66.5 ± 16.2 (70.0)  | .99  |
| Baseline creatinine clearance rate, mL/min | 73.3 ± 33.3 (74.8)             | 55.9 ± 34.7 (54.0)  | .038 |
| Male sex                                   | 12 (67)                        | 26 (58)             | .51  |
| Located in an ICU on day 1                 | 9 (50)                         | 19 (42)             | .57  |
| Receipt of mechanical ventilation          | 10 (56)                        | 15 (35)             | .13  |
| Comorbid disease or condition              |                                |                     |      |
| Diabetes                                   | 4 (22)                         | 15 (33)             | .55  |
| Congestive heart failure                   | 4 (22)                         | 17 (38)             | .38  |
| Coronary artery disease                    | 3 (17)                         | 20 (44)             | .047 |
| Peripheral vascular disease                | 4 (22)                         | 10 (22)             | 1.0  |
| Dialysis-dependent renal failure           | 1 (6)                          | 8 (18)              | .43  |
| COPD                                       | 6 (33)                         | 14 (31)             | .86  |
| Cirrhosis                                  | 0 (0)                          | 2 (4)               | 1.0  |
| Malignancy                                 | 1 (6)                          | 8 (18)              | .43  |
| Alcoholism                                 | 2 (11)                         | 1 (2)               | .19  |
| Cystic fibrosis                            | 0 (0)                          | 1 (2)               | 1.0  |
| Steroid use                                | 5 (28)                         | 9 (20)              | .52  |
| HIV infection                              | 0 (0)                          | 1 (2)               | 1.0  |
| Transplant recipient                       | 1 (6)                          | 1 (2)               | .49  |
| Isolate characteristic                     |                                |                     |      |
| Vancomycin susceptibility, MIC             |                                |                     | .004 |
| 0.5                                        | 11 (61)                        | 10 (22)             |      |
| 1.0                                        | 5 (28)                         | 12 (27)             |      |
| 2.0                                        | 2 (11)                         | 23 (51)             |      |
| Group II <i>agr</i> specificity            | 5 (28)                         | 31 (69)             | .003 |

**NOTE.** Data are no. (%) of patients or mean value ± SD. *agr*, accessory gene regulator; COPD, chronic obstructive pulmonary disease; ICU, intensive care unit.

to determine if death was directly attributable to MRSA infection.

## DISCUSSION

Infections with *S. aureus* are associated with mortality rates of 15%–60%, and a recent meta-analysis of published reports on *S. aureus* bacteremia suggests that MRSA bacteremia has a mortality risk that is almost twice that of MSSA bacteremia [27]. One of several possible explanations for this observation is that antimicrobial therapy for treatment of MRSA infection is not as effective as therapy for MSSA infection. Vancomycin has been considered to be less effective against MRSA infection than  $\beta$ -lactams have been against MSSA infection [28, 29].

At the present time, vancomycin remains the standard treatment for infections due to MRSA. However, vancomycin treatment failures have been reported even when isolates were

determined to be susceptible using current clinical microbiological methods [11–13]. Bactericidal therapy is believed to be critical in the treatment of bloodstream infections, and, therefore, clinical failures with vancomycin may be at least partially explained by tolerance to vancomycin by some MRSA isolates, as some of our preliminary data suggests (G. Sakoulas, P. Moise-Broder, G. Eliopoulos, et al.; unpublished data).

We believe that clinical GISA isolates represent the final evolutionary step in a multiple-stage process that MRSA has undergone because of vancomycin selection pressure. MRSA organisms in the hospital have developed the capability to survive in a glycopeptide-rich environment. As such, we found it to be very interesting that ~55% to 60% of MRSA isolates and all 6 of the Centers for Disease Control and Prevention–confirmed GISA isolates in the United States that we evaluated have the *agr* group II polymorphism. Our previous studies

**Table 3. Multivariate analysis of factors associated with successful vancomycin treatment.**

| Factor                             | OR (95% CI)                      | P    |
|------------------------------------|----------------------------------|------|
| Baseline creatinine clearance rate | 1.198 (1.002–1.433) <sup>a</sup> | .047 |
| Non-group II <i>agr</i>            | 6.935 (1.774–27.112)             | .005 |

<sup>a</sup> Per 10 mL/min change in clearance. *agr*, accessory gene regulator.

suggested that the glycopeptide-influenced selection process for *S. aureus* may begin with the clonal background of MRSA [20, 22]. We undertook the present study, therefore, to determine if the group II *agr* polymorphism would confer any clinical significance with respect to vancomycin efficacy.

Our study showed a very strong statistical relationship between vancomycin treatment failure and infection due to MRSA with the *agr* group II polymorphism. The *agr* group II polymorphism was found to be an independent predictor of vancomycin treatment failure in patients with MRSA infection. This is the first report linking a specific genetic polymorphism in *S. aureus* to antimicrobial treatment failure. These findings may serve as an initial step toward providing clinicians with useful information for guiding treatment of patients with MRSA infection. The explanation behind the findings in the present article is not clear, but we feel that these results lend support to our previous findings of possible selective advantages of some clonal types of *S. aureus* with the *agr* group II polymorphism under glycopeptide selection pressure [22]. It is clear that more-detailed genetic and biochemical testing, as well as epidemiological studies of MRSA, in the setting of increasing vancomycin exposure will be necessary to lend further support to these findings.

At the time of writing, we suspect that it may not be the *agr* specificity group itself but, rather, select clonal backgrounds within this *agr* group that may have the intrinsic advantages under vancomycin selection and may, therefore, be more likely responsible for the failure of vancomycin therapy. With further study of the genetic backgrounds that comprise *agr* group II *S. aureus*, perhaps using the more discriminatory method of multilocus sequence typing, one may be able to determine even more-specific markers for MRSA bacteremia treatment failure.

The strong correlation between infection with *agr* group II MRSA and vancomycin treatment failure did not translate into a difference in mortality rate. However, this study was not reliable in its evaluation of mortality, because most of the patients who did not respond to vancomycin therapy received salvage therapy with newer antimicrobial agents in accordance with compassionate-use protocols. Whether vancomycin treatment failure leading to prolonged bacteremia translates into increased morbidity in the form of metastatic complications would be an interesting subject for future study.

Finally, we found diminished creatinine clearance rate to be

the only other variable with a statistically significant association with vancomycin treatment failure. We can only speculate, but this finding suggests that perhaps there are mechanisms of the antistaphylococcal host defense that are impaired in uremic patients. For example, it is known that the uremic state is characterized by impaired platelet aggregation, perhaps through circulating fibrinogen fragments [30]. Evidence suggests that platelet aggregation may serve an integral role in host defense against *S. aureus* bloodstream infections [31, 32].

In summary, we have demonstrated a strong relationship between vancomycin treatment failure and MRSA isolates with the group II polymorphism at the *agr* locus. Together with our previous findings that the *agr* group II polymorphism is common among GISA [20, 22], these observations suggest that *S. aureus*—particularly MRSA—may be evolving at the clonal level (because of increasing glycopeptide use) to maximize survival.

## Acknowledgments

**Conflict of interest.** G.M.E. received recent research funding from and consulted for Aventis Pharmaceuticals, Cubist Pharmaceuticals, and Pfizer; B.M. served as a consultant for Aventis Pharmaceuticals, Cubist Pharmaceuticals, and Pfizer; and J.J.S. served as a consultant for King Pharmaceuticals.

## References

1. National Nosocomial Infections Surveillance (NNIS) system report, data summary from January 1992–June 2001, issued August 2001. *Am J Infect Control* **2001**;29:404–21.
2. Panlilio AL, Culver DH, Gaynes RP, et al. Methicillin-resistant *Staphylococcus aureus* in US hospitals, 1975–1991. *Infect Control Hosp Epidemiol* **1992**;13:582–6.
3. Emori TG, Gaynes RP. An overview of nosocomial infections, including the role of the microbiology laboratory. *Clin Microbiol Rev* **1993**;6:428–42.
4. Diekema DJ, Pfaller MA, Schmitz FJ, et al. Survey of infections due to *Staphylococcus* species: frequency of occurrence and antimicrobial susceptibility of isolates collected in the United States, Canada, Latin America, Europe, and the Western Pacific region for the SENTRY Antimicrobial Surveillance Program, 1997–1999. *Clin Infect Dis* **2001**;32(Suppl 2):S114–32.
5. *Staphylococcus aureus* with reduced susceptibility to vancomycin—Illinois, 1999. *MMWR Morb Mortal Wkly Rep* **2000**;48:1165–7.
6. Hiramatsu K, Hanaki H, Ino T, Yabuta K, Oguri T, Tenover FC. Methicillin-resistant *Staphylococcus aureus* clinical strain with reduced vancomycin susceptibility. *J Antimicrob Chemother* **1997**;40:135–6.
7. Rotun SS, McMath V, Schoonmaker DJ, et al. *Staphylococcus aureus* with reduced susceptibility to vancomycin isolated from a patient with fatal bacteremia. *Emerg Infect Dis* **1999**;5:147–9.
8. Sieradzki K, Roberts RB, Haber SW, Tomasz A. The development of vancomycin resistance in a patient with methicillin-resistant *Staphylococcus aureus* infection. *N Engl J Med* **1999**;340:517–23.
9. Smith TL, Pearson ML, Wilcox KR, et al. Emergence of vancomycin resistance in *Staphylococcus aureus*. Glycopeptide-Intermediate *Staphylococcus aureus* Working Group. *N Engl J Med* **1999**;340:493–501.

10. *Staphylococcus aureus* resistant to vancomycin—United States, 2002. MMWR Morb Mortal Wkly Rep **2002**;51:565–7.
11. Sander A, Beiderlinden M, Schmid EN, Peters J. Clinical experience with quinupristin-dalfopristin as rescue treatment of critically ill patients infected with methicillin-resistant staphylococci. Intensive Care Med **2002**;28:1157–60.
12. Drew RH, Perfect JR, Srinath L, Kurkimilis E, Dowzicky M, Talbot GH. Treatment of methicillin-resistant *Staphylococcus aureus* infections with quinupristin-dalfopristin in patients intolerant of or failing prior therapy. The Synercid Emergency-Use Study Group. J Antimicrob Chemother **2000**;46:775–84.
13. Moise PA, Schentag JJ. Vancomycin treatment failures in *Staphylococcus aureus* lower respiratory tract infections. Int J Antimicrob Agents **2000**;16(Suppl 1):S31–4.
14. Moise PA, Forrest A, Birmingham MC, Schentag JJ. The efficacy and safety of linezolid as treatment for *Staphylococcus aureus* infections in compassionate use patients who are intolerant of, or who have failed to respond to, vancomycin. J Antimicrob Chemother **2002**;50:1017–26.
15. Recsei P, Kreiswirth B, O'Reilly M, Schlievert P, Gruss A, Novick RP. Regulation of exoprotein gene expression in *Staphylococcus aureus* by agar. Mol Gen Genet **1986**;202:58–61.
16. Arvidson S, Tegmark K. Regulation of virulence determinants in *Staphylococcus aureus*. Int J Med Microbiol **2001**;291:159–70.
17. Dufour P, Gillet Y, Bes M, et al. Community-acquired methicillin-resistant *Staphylococcus aureus* infections in France: emergence of a single clone that produces Panton-Valentine leukocidin. Clin Infect Dis **2002**;35:819–24.
18. Naimi TS, LeDell KH, Como-Sabetti K, et al. Comparison of community- and health care-associated methicillin-resistant *Staphylococcus aureus* infection. JAMA **2003**;290:2976–84.
19. Pearman JW. Community-acquired MRSA: the Australian experience [abstract 359]. In: Program and abstracts of the 10th International Symposium on Staphylococci and Staphylococcal Infections (Tsukuba, Japan). Tokyo: Japanese Association for Infectious Diseases, **2002**:18.
20. Sakoulas G, Eliopoulos GM, Moellering RC Jr, et al. Accessory gene regulator (*agr*) locus in geographically diverse *Staphylococcus aureus* isolates with reduced susceptibility to vancomycin. Antimicrob Agents Chemother **2002**;46:1492–502.
21. Jarraud S, Mougél C, Thioulouse J, et al. Relationships between *Staphylococcus aureus* genetic background, virulence factors, *agr* groups (alleles), and human disease. Infect Immun **2002**;70:631–41.
22. Sakoulas G, Eliopoulos GM, Moellering RC Jr, et al. *Staphylococcus aureus* accessory gene regulator (*agr*) group II: is there a relationship to the development of intermediate-level glycopeptide resistance? J Infect Dis **2003**;187:929–38.
23. Center for Drug Evaluation and Research. Evaluating clinical studies of antimicrobials in the division of anti-infective drug products. **1997**. Available at: <http://www.fda.gov/cder/guidance/draft9al.pdf>. Accessed January 2004.
24. Moore PC, Lindsay JA. Genetic variation among hospital isolates of methicillin-sensitive *Staphylococcus aureus*: evidence for horizontal transfer of virulence genes. J Clin Microbiol **2001**;39:2760–7.
25. Sakoulas G, Gold HS, Venkataraman L, DeGirolami PC, Eliopoulos GM, Qian Q. Methicillin-resistant *Staphylococcus aureus*: comparison of susceptibility testing methods and analysis of *mecA*-positive susceptible strains. J Clin Microbiol **2001**;39:3946–51.
26. Lyon GJ, Mayville P, Muir TW, Novick RP. Rational design of a global inhibitor of the virulence response in *Staphylococcus aureus*, based in part on localization of the site of inhibition to the receptor-histidine kinase, AgrC. Proc Natl Acad Sci U S A **2000**;97:13330–5.
27. Cosgrove SE, Sakoulas G, Perencevich EN, Schwaber MJ, Karchmer AW, Carmeli Y. Comparison of mortality associated with methicillin-resistant and methicillin-susceptible *Staphylococcus aureus* bacteremia: a meta-analysis. Clin Infect Dis **2003**;36:53–9.
28. Gonzalez C, Rubio M, Romero-Vivas J, Gonzalez M, Picazo JJ. Bacteremic pneumonia due to *Staphylococcus aureus*: a comparison of disease caused by methicillin-resistant and methicillin-susceptible organisms. Clin Infect Dis **1999**;29:1171–7.
29. Rello J, Diaz E, Bodi M. Appropriate antibiotic treatment for pneumonia. Clin Infect Dis **2000**;31:1313–5.
30. Kozek-Langenecker SA, Spiss CK, Michalek-Sauberer A, Felfernig M, Zimpfer M. Effect of prostacyclin on platelets, polymorphonuclear cells, and heterotypic cell aggregation during hemofiltration. Crit Care Med **2003**;31:864–8.
31. Kupferwasser LI, Yeaman MR, Shapiro SM, Nast CC, Bayer AS. In vitro susceptibility to thrombin-induced platelet microbicidal protein is associated with reduced disease progression and complication rates in experimental *Staphylococcus aureus* endocarditis: microbiological, histopathologic, and echocardiographic analyses. Circulation **2002**;105:746–52.
32. Mercier RC, Rybak MJ, Bayer AS, Yeaman MR. Influence of platelets and platelet microbicidal protein susceptibility on the fate of *Staphylococcus aureus* in an in vitro model of infective endocarditis. Infect Immun **2000**;68:4699–705.
